---

---

## EDITORS

---

**Deborah J. Hales, M.D.**  
Arlington, Virginia

**Mark Hyman Rapaport, M.D.**  
Atlanta, Georgia

### PATIENT MANAGEMENT EXERCISE

**Ian A. Cook, M.D.**  
Los Angeles, California

### ETHICS COMMENTARY

**Laura Weiss Roberts, M.D.**  
Stanford, California

### COMMUNICATION COMMENTARY

**Dorothy E. Stubbe, M.D.**  
New Haven, Connecticut

---

---

## SENIOR ADVISORY BOARD

---

**Carol A. Bernstein, M.D.**  
New York, New York

**Kathleen T. Brady, M.D., Ph.D.**  
Charleston, South Carolina

**Peter F. Buckley, M.D.**  
Augusta, Georgia

**Pedro L. Delgado, M.D.**  
San Antonio, Texas

**Glen O. Gabbard, M.D.**  
Houston, Texas

**Ira M. Lesser, M.D.**  
Torrance, California

**Charles F. Reynolds III, M.D.**  
Pittsburgh, Pennsylvania

**Pedro Ruiz, M.D.**  
Miami, Florida

**Stephen C. Scheiber, M.D.**  
Glenview, Illinois

**Daniel K. Winstead, M.D.**  
New Orleans, Louisiana

**Joel Yager, M.D.**  
Denver, Colorado

---

---

## EDITORIAL BOARD

---

**Joseph A. Cheong, M.D.**  
Gainesville, Florida

**Richard Balon, M.D.**  
Rochester Hills, Michigan

**Donald M. Hilty, M.D.**  
Sacramento, California

**Geetha Jayaram, M.D., M.B.A.**  
Baltimore, Maryland

**Avram H. Mack, M.D.**  
Washington, D.C.

**Daryl Matthews, M.D.**  
Honolulu, Hawaii

**Cheryl F. McCartney, M.D.**  
Chapel Hill, North Carolina

**Philip R. Muskin, M.D.**  
New York, New York

**Michele T. Pato, M.D.**  
Los Angeles, California

**Victor I. Reus, M.D.**  
San Francisco, California

**Cynthia W. Santos, M.D.**  
Houston, Texas

**Deborah Spitz, M.D.**  
Chicago, Illinois

**James W. Thompson, M.D., M.P.H.**  
Glen Cove, New York

**Joyce A. Tinsley, M.D.**  
Farmington, Connecticut

**Sidney Zisook, M.D.**  
San Diego, California

  


# FOCUS

THE JOURNAL OF LIFELONG LEARNING IN PSYCHIATRY

*American Psychiatric Publishing*

### EDITORIAL DIRECTOR, JOURNALS

Michael D. Roy

*American Psychiatric Association  
Division of Continuing Medical Education*

### ASSOCIATE DIRECTOR, FOCUS

Kristen Moeller

### EDITORIAL SERVICES MANAGER

Miriam Epstein

FOCUS, A Journal of the American Psychiatric Association published by American Psychiatric Publishing  
ISSN 1541-4094. Printed in the United States.

Published quarterly. Periodicals postage paid at Arlington, VA, and additional mailing offices. POSTMASTER: Send address changes to FOCUS, Circulation Department, American Psychiatric Publishing, 1000 Wilson Blvd., Suite 1825, Arlington, VA 22209-3901.

### Subscriptions

U.S. APA member \$330.00, U.S. non-member \$530.00, student \$107.00 (electronic only), Canada and foreign APA member \$415.00, Canada and international non-member \$614.00; (703) 907-7300 or (800) 368-5777.

### Officers of the Association

Dilip V. Jeste, M.D., *President*  
Jeffrey A. Lieberman, M.D., *President-Elect*  
Roger Peele, M.D., *Secretary*  
James H. Scully, Jr., M.D., *Medical Director*

### Editorial Offices

Telephone: (703) 907-8637, Fax: (703) 907-7849  
Journal Web site: [focus.psychiatryonline.org](http://focus.psychiatryonline.org)  
CME Web site: [cme.psychiatryonline.org](http://cme.psychiatryonline.org)

### Change of Address and Assistance With Online Subscriptions

Call Circulation at (703) 907-7300 or (800) 368-5777 or send an email to [accessnumber@psych.org](mailto:accessnumber@psych.org)

### CME

Telephone: (703) 907-8637, Fax: (703) 907-7849

### Subscriber Number

FOCUS subscriber numbers are printed on the FOCUS label above your name. Call (800) 368-5777 for assistance in identifying your subscriber number.

Copyright © 2012, American Psychiatric Association.

Criteria sets reprinted from Diagnostic and Statistical Manual of Mental Disorders, 4th Edition, Text Revision. Copyright © 2000, American Psychiatric Association. Used with permission.
