# APA JobCentral

## The Career Hub for Psychiatry

### Connects Talent with Opportunity

Filling an open position? Searching for that ideal job?  
Get started at [jobs.psychiatry.org](http://jobs.psychiatry.org)

#### Manage Your Career

- Search APA JobCentral for psychiatry jobs by position, title, specialty, work setting, location, and key words to access relevant jobs.
- Create an account to save jobs, store multiple resumes and cover letters, keep notes, communicate with employers through our internal messaging system, and more through an engaging interface.
- Set up multiple Job Alerts specifying your skills, interests and location to receive an e-mail when an employer posts a job that matches your criteria.

#### Recruit for Open Positions

- Post your job in front of highly qualified psychiatrists.
- Cross promote your job listing in APA print publications, e-newsletters and social networking platforms such as Facebook and Twitter.
- Search the anonymous resume database to find your ideal candidate.

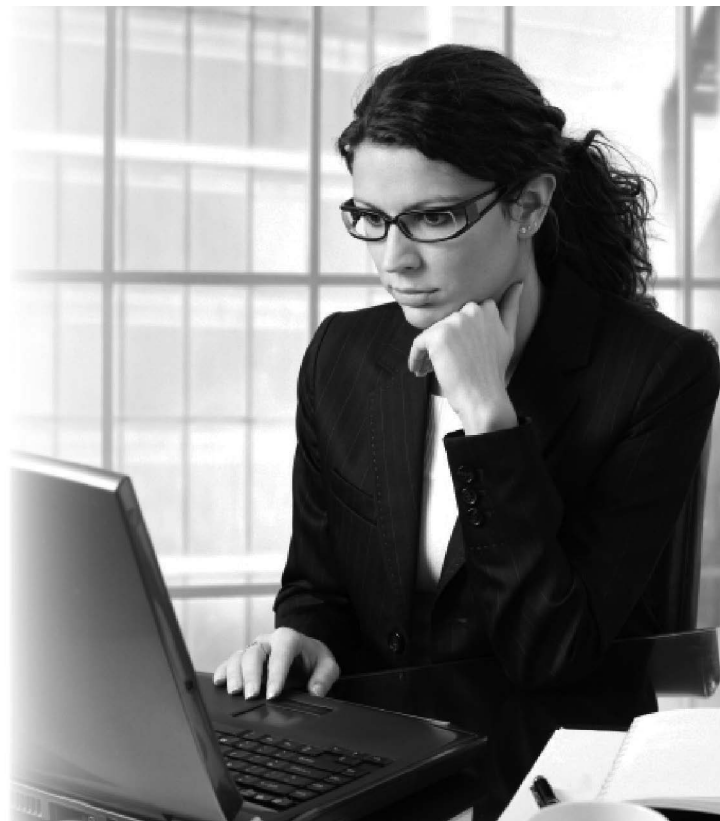

Go to [jobs.psychiatry.org](http://jobs.psychiatry.org) to get started!

**APA JobCentral**  
The Career Hub for Psychiatry
