# FOCUS

THE JOURNAL OF LIFELONG LEARNING IN PSYCHIATRY

## *Child and Adolescent Psychiatry: Life Cycle and Family*

*Guest Editors, David L. Kaye, M.D.  
Eugene V. Beresin, M.D.*

### IN CLINICAL SYNTHESIS:

Treating Parents of Children with Chronic Health Conditions

*Beth A. Smith, M.D.  
David L. Kaye, M.D.*

Attention Deficit Hyperactivity Disorder Through the Life Cycle

*Anthony L. Rostain, M.D., M.A.*

Understanding Technology Use Throughout Development

*Tristan Gorrindo, M.D. et al.*

Overview of Intellectual/Developmental Disabilities

*Jarrett Barnhill, M.D., D.F.A.P.A., F.A.A.C.A.P.  
Donna McNelis, Ph.D.*

AND INFLUENTIAL PUBLICATIONS...
